# Supplementary material for: Extended Interactions between HIV-1 Viral RNA and tRNALys3 Are Important to Maintain Viral RNA Integrity
Source: MDPI journal article supplement (doi:10.3390/ijms22010058), 2020-12-23
Supplement: s1 [file s1]

## Supplementary Material

### **Extended interactions between HIV-1 viral RNA and tRNA<sup>Lys3</sup> are important to maintain viral RNA integrity**

Thomas Gremminger †, Zhenwei Song †, Juan Ji, Avery Foster, Kexin Weng, and Xiao Heng

Department of Biochemistry, University of Missouri, Columbia, 65211

\* Correspondence: [hengx@missouri.edu](mailto:hengx@missouri.edu)

† These authors contributed equally to this work.

Keywords: HIV-1 PBS, tRNA, reverse transcription, degradation, genome integrity.



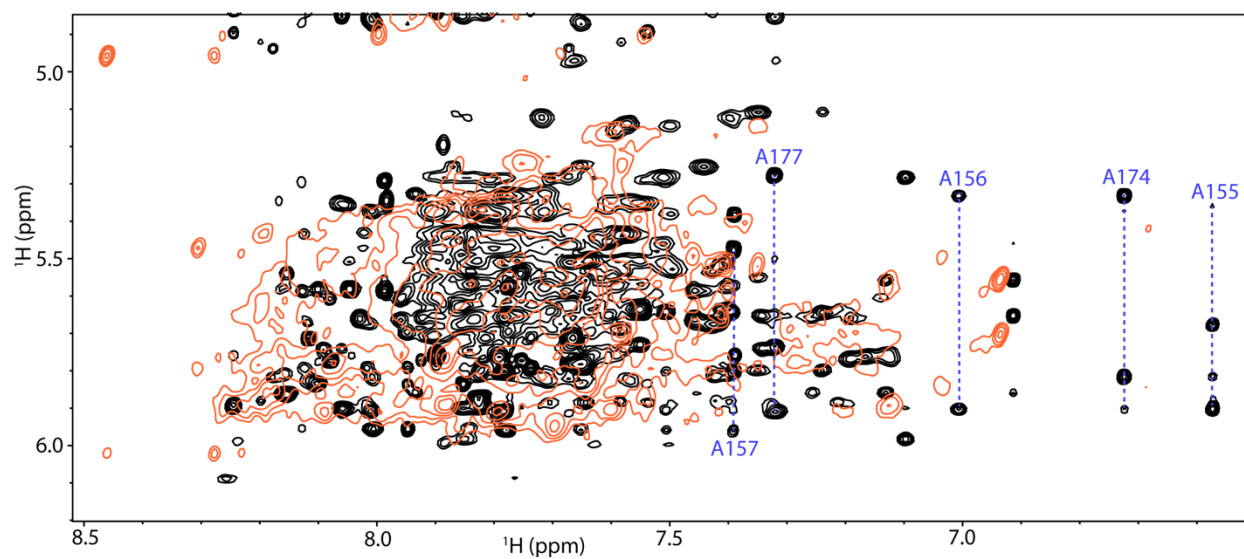

Figure S2. Annealing of tRNA<sup>Lys3</sup> to PBS-segment disrupted folding of A-rich loop hairpin. Portion of the aromatic region of 2D  $^1\text{H}$ - $^1\text{H}$  NOESY spectra with PBS-segment shown in black and PBS-segment: tRNA<sup>Lys3</sup> complex shown in orange. Resonances of A-rich loop hairpin nucleotides are shown with blue dashed lines.



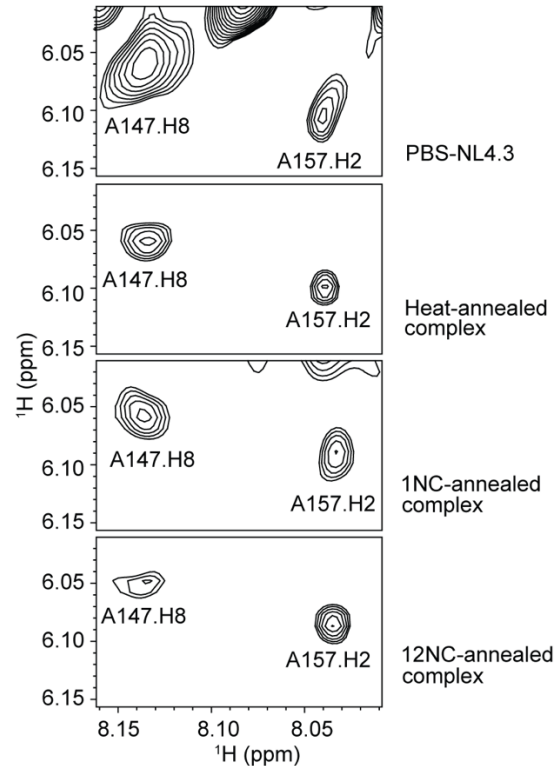

Figure S4. The intensity of A147.H8 decreased upon NC annealing. Portions of 2D  $^1\text{H}$ - $^1\text{H}$  NOESY NMR spectra of PBS-NL4.3, heat annealed complex, 1 NC annealed complex (NC: RNA=1:1), and 12 NC annealed complex (NC: RNA=12:1) are shown. The NC proteins were removed by high salt washes prior to NMR data collection. Peak intensities are quantified in table S1.

Table S1: Quantification of peak intensities of 147.H8 and 157.H2 in 2D NOESY spectra of complexes annealed under different conditions.

|                       | 147.H8 | 157.H2 | 147.H8/157.H2 |
|-----------------------|--------|--------|---------------|
| Heat-annealed complex | 1.87   | 1.78   | 105%          |
| 1NC-annealed complex  | 1.90   | 1.77   | 107%          |
| 12NC-annealed complex | 1.10   | 1.88   | 59%           |

Table S2. Table of primers used in this study. Notes list which experiment primers were used for.

| Primer                       | Sequence (5'-3')                                       | Notes                                              |
|------------------------------|--------------------------------------------------------|----------------------------------------------------|
| MAL5UTRNL4-3ChimeraUTRF      | CTTTTGCCTGTACTGGTCTCTCTTGTTA<br>GACCAGGTCGAG           | Construction of chimeric virus plasmid             |
| MAL5UTRNL4-3ChimeraBackboneR | AGTACAGGCCAAAAAGCAGCTGCTTATA<br>TGTAGCATCTGAGGG        | Construction of chimeric virus plasmid             |
| MAL5UTRNL4-3ChimeraBackboneF | GGTGCGAGAGCGTCGGTATTAAGCGGG                            | Construction of chimeric virus plasmid             |
| MAL5UTRNL4-3ChimeraUTRR      | CGACGCTCTCGCACCCATCTCTCTCCTT                           | Construction of chimeric virus plasmid             |
| MAL-TAR-F                    | GCATCTAATACGACTCACTATAGGTCTC<br>TCTTGTTAGAC            | Production of template for transcription           |
| MAL-358-R                    | CGCACCCATCTCTCTCCTTCTAGC                               | Production of template for transcription           |
| MAL-MutA-F                   | GTCTTCGGATCTCTAGCAGTGGCGCCCG<br>AACAG                  | Mutagenesis of MAL plasmid                         |
| MAL-MutA-R                   | TAGAGATCCGAAGACCGTCTAGAGTGG<br>TCTGAGGGATCTCTAGTTACCAG | Mutagenesis of MAL plasmid                         |
| 3'-ori-R                     | CTCAAGTCAGAGGTGGCGAAACCCGAC<br>AG                      | Mutagenesis of MAL plasmid                         |
| 5'-ori-F                     | CACCTCTGACTTGAGCGTCGATTTTTGT<br>GATGC                  | Mutagenesis of MAL plasmid                         |
| MAL-PBS-F                    | GCTAGTAATACGACTCACTATAGGCTCT<br>GGTAACTAGAGA           | Production of template for transcription           |
| MAL-PBS-R                    | GGCTCTGGAACCTCCGCTTTCGAGTC                             | Production of template for transcription           |
| BstZ17I-F                    | CCTTCACCTGAAATGTGTGTATACAAAA<br>TCTAGGCCAGTC           | Introducing PBS-M mutant into pNJ4-3 plasmid       |
| BstZ17I-R                    | CTAGGTATGGTAAATGCAGTATACTTCC<br>TGAAGTCTTTATC          | Introducing PBS-M mutant into pNJ4-3 plasmid       |
| NL4-3-PBSM-F                 | AGACCCTTTTAGTCAGTGTGGTTATCTC<br>TAGCAGTGGCGCCCGAACAG   | Introducing PBS-M mutant into pNJ4-3 plasmid       |
| NL4-3-PBSM-R                 | CACACTGACTAAAAGGGTCTGAGTTATC<br>TCTAGTTACCAGAGTCACAC   | Introducing PBS-M mutant into pNJ4-3 plasmid       |
| RT-E478Q-F                   | CTCAGTTACAAGCAATTCATCTAGCTTT<br>GCAGGATTGC             | Introducing E478Q mutant into the pRT-Dual plasmid |
| RT-E478Q-R                   | ATGAATTGCTTGTAAGTCTGAGTCTTCTGA<br>TTTGTTGTGTC          | Introducing E478Q mutant into the pRT-Dual plasmid |
| pRT-Dual-F                   | GGCAACGCCAATCAGCAACGACTGTTT<br>GC                      | Introducing E478Q mutant into the pRT-Dual plasmid |
| pRT-Dual-R                   | GCTGATTGGCGTTGCCACCTCCAGTCTG                           | Introducing E478Q mutant into the pRT-Dual plasmid |
| hRU5-F2bb                    | GCCTCAATAAAGCTTGCCTTGA                                 | Quantification of cDNA/<br>RNA integrity assay     |
| MAL-hRU5-R3                  | TAGAGTGGTCTGAGGGATCT                                   | Quantification of cDNA/<br>RNA integrity assay     |
| MAL-hRU5-probe               | AGAGTCACACAACAGATGGGCACACAC<br>T                       | Quantification of cDNA/<br>RNA integrity assay     |

|                   |                                   |                     |
|-------------------|-----------------------------------|---------------------|
| Gag-F1b           | CTAGAACGATTTCGCAGTTAATCCT         | RNA integrity assay |
| Gag-R1b           | CTATCCTTTGATGCACACAATAGAG         | RNA integrity assay |
| P-HUS-103 (probe) | CATCAGAAGGCTGTAGACAAATACTGG<br>GA | RNA integrity assay |
